# Supplementary material for: Community Social Capital Enhances the Subjective Well-Being of Urban Residents: The Mediating Role of Psychological Flourishing and Moderating Effect of Educational Attainment
Source: MDPI journal article supplement (doi:10.3390/socsci13040214), 2024-04-16
Supplement: s1 [file s1]

## Questionnaires

Age: \_\_\_\_\_ year(s)

Gender: (1) female      (2) male

Marital Status: (1) unmarried      (2) with a spouse      (3) divorced      (4) widowed

Education: (1) Primary education or below      (2) Graduated from middle school

(3) Graduated from technical secondary school      (4) Graduated from high school

(5) College-educated      (6) Master graduated      (7) Graduation of doctor

Monthly income: (1) less than 3000 RMB      (2) 3001-5000 RMB

(3) 5001-10000 RMB      (4) more than 10000 RMB

Dwelling Time: \_\_\_\_\_ year(s)

### Life satisfaction

Below are five statements that you may agree or disagree with. Using the 1-7 scale below, indicate your agreement with each item by placing the appropriate number on the line preceding that item. Please be open and honest in your responding.

1 - Strongly disagree 2 - Disagree 3 - Slightly disagree 4 - Neither agree nor disagree

5 - Slightly agree 6 - Agree 7 - Strongly agree

|                                                              | 1 | 2 | 3 | 4 | 5 | 6 | 7 |
|--------------------------------------------------------------|---|---|---|---|---|---|---|
| In most ways my life is close to my ideal.                   |   |   |   |   |   |   |   |
| The conditions of my life are excellent.                     |   |   |   |   |   |   |   |
| I am satisfied with my life.                                 |   |   |   |   |   |   |   |
| So far I have gotten the important things I want in life.    |   |   |   |   |   |   |   |
| If I could live my life over, I would change almost nothing. |   |   |   |   |   |   |   |

### Flourishing

Below are eight statements with which you may agree or disagree. Using the 1–7 scale below, indicate your agreement with each item by indicating that response for each statement. Please be open and honest in your responding.

1 - Strongly disagree 2 - Disagree 3 - Slightly disagree 4 - Neither agree nor disagree

5 - Slightly agree 6 - Agree 7 - Strongly agree

|                                                                       | 1 | 2 | 3 | 4 | 5 | 6 | 7 |
|-----------------------------------------------------------------------|---|---|---|---|---|---|---|
| I lead a purposeful and meaningful life                               |   |   |   |   |   |   |   |
| My social relationships are supportive and rewarding                  |   |   |   |   |   |   |   |
| I am engaged and interested in my daily activities                    |   |   |   |   |   |   |   |
| I actively contribute to the happiness and well-being of others       |   |   |   |   |   |   |   |
| I am competent and capable in the activities that are important to me |   |   |   |   |   |   |   |
| I am a good person and live a good life                               |   |   |   |   |   |   |   |
| I am optimistic about my future                                       |   |   |   |   |   |   |   |
| People respect me                                                     |   |   |   |   |   |   |   |

### Community social capital

Below are fourteen statements with which you may agree or disagree. Using the 1–5 scale below, indicate your agreement with each item by indicating that response for each statement. Please be open and honest in your responding.

1 - Strongly disagree    2 - Slightly disagree    3 - Neither agree nor disagree

4 - Slightly agree    5 - Strongly agree

|                                                                                               | 1 | 2 | 3 | 4 | 5 |
|-----------------------------------------------------------------------------------------------|---|---|---|---|---|
| I am proud to be a member of the local community                                              |   |   |   |   |   |
| Overall, I trust the majority of the residents in the local community                         |   |   |   |   |   |
| The local residents help each other out                                                       |   |   |   |   |   |
| I often discuss community issue with my neighbors                                             |   |   |   |   |   |
| I have good friends in the local community                                                    |   |   |   |   |   |
| I have contact with my neighbors frequently                                                   |   |   |   |   |   |
| My neighbor can pick up deliveries, milk and newspapers for me when I am not at home.         |   |   |   |   |   |
| If there is something wrong with the local community, I would work it out with my neighbors.  |   |   |   |   |   |
| I trust the owner committee in the local community.                                           |   |   |   |   |   |
| I trust the regulation that applied to the owners in the local community.                     |   |   |   |   |   |
| I have confidence in the development of the local community.                                  |   |   |   |   |   |
| The local community makes me feel like at home.                                               |   |   |   |   |   |
| Most of the neighbors are willing to do something for the development of the local community. |   |   |   |   |   |
| I am willing to solve the community issue with my neighbors.                                  |   |   |   |   |   |
